# Supplementary material for: Effects of vegetation restoration in karst areas on soil nitrogen mineralisation
Source: PeerJ. 2024 Dec 20;12:e18582. doi: 10.7717/peerj.18582 (PMC11665430; doi:10.7717/peerj.18582)
Supplement: Supplemental Information 1 [file peerj-12-18582-s001.xlsx]

## Sheet: environmental factor
vegetation	soil depth	vegetation restoration years	dominant species	TN	TP	TK	AN	AP	AK	SOC	Sa	Ci	Si	BD	pH	STP	SMC	NH+4-N	NO-3-N
cropland	0-5cm	0	Zea mays	3.14	0.15	10.85	153.5	8.5	82	24.11	25.8	26	48.2	1.19	5.09	50.74	20.4	0.18	393.57
cropland	5-10cm	0	Zea mays	2.11	0.15	10.73	140.52	12.25	46.91	21.39	24	26.2	49.8	1.24	5.13	49.98	22.25	0.2	317.7
cropland	10-20cm	0	Zea mays	1	0.11	10.19	117.4	6.45	30	14.54	20.4	27.4	52.2	1.39	5.15	43.23	20.03	0.17	30.08
cropland	20-30cm	0	Zea mays	1.09	0.08	10.52	54.18	2.25	52	9.85	20	34.2	45.8	1.2	5.47	50.05	25.64	0.2	6.59
cropland	30-40cm	0	Zea mays	0.96	0.08	11.5	52.5	1.96	56.89	9.32	19.6	36	44.4	1.16	5.87	59.73	32.57	0.17	7.86
cropland	0-5cm	0	Zea mays	4.24	0.14	10.67	155.26	6.05	74.85	23.02	22.6	23.8	53.6	1.15	5.21	52.98	22.34	0.21	407.38
cropland	5-10cm	0	Zea mays	4.97	0.14	10	142.38	7.2	52	15.23	23	24.4	52.6	1.37	5.03	43.37	19.4	0.2	367.86
cropland	10-20cm	0	Zea mays	3.07	0.13	10.2	123.62	6.16	42	21.74	21.4	24.6	54	1.35	5.32	46.25	24.85	0.2	214.84
cropland	20-30cm	0	Zea mays	0.17	0.08	10.82	65.8	1.61	54	10.45	21.2	26.2	52.6	1.43	5.79	43.17	21.05	0.23	242.78
cropland	30-40cm	0	Zea mays	1.19	0.08	13.67	35.7	1.27	63	11.49	22.2	34	43.8	1.23	5.67	47.32	25.92	0.19	147.06
cropland	0-5cm	0	Zea mays	1.95	0.15	10.2	159.6	5.39	56	19.89	26	22.4	51.6	1.29	4.88	42.84	17.19	0.47	440.87
cropland	5-10cm	0	Zea mays	2.23	0.14	9.7	155.62	6.21	62	21.37	22.4	22.6	55	1.16	5.12	54.51	21.03	0.25	346.9
cropland	10-20cm	0	Zea mays	1.58	0.14	10.31	124	5.1	58.88	21.63	24	22.6	53.4	1.37	5.18	47.48	19.21	0.23	256.59
cropland	20-30cm	0	Zea mays	1.69	0.12	13.29	66.82	1.72	64	14.72	37	19.8	43.2	1.36	6.75	46.61	21.05	0.16	39.13
cropland	30-40cm	0	Zea mays	1.75	0.15	16.51	33.62	1.57	72	18.64	40	19.6	40.4	1.04	6.64	51.96	23.37	0.21	59.76
5-year-old grassland	0-5cm	5	Imperata cylindrical (L.) Beauv	2.37	0.15	10.44	148.82	4.22	88	28	26	21.4	52.6	1.3	5.72	48.77	20.26	0.43	56.43
5-year-old grassland	5-10cm	5	Imperata cylindrical (L.) Beauv	2.05	0.15	10.53	178.08	4.23	65.87	27.47	36.2	20	43.8	1.3	5.93	45.97	22.6	0.21	47.38
5-year-old grassland	10-20cm	5	Imperata cylindrical (L.) Beauv	1.81	0.15	10.22	151.34	3.81	50	21.18	35	21.8	43.2	1.31	6.17	49.63	21.72	0.12	32.14
5-year-old grassland	20-30cm	5	Imperata cylindrical (L.) Beauv	1.37	0.12	9.33	162.82	2.44	38.92	18.74	39.4	16	44.6	1.38	6.6	50.14	20.93	0.12	35.63
5-year-old grassland	30-40cm	5	Imperata cylindrical (L.) Beauv	1.79	0.16	10.67	154.28	1.86	36	20.85	38.4	16.4	45.2	1.21	6.92	57.15	27.16	0.14	10.56
5-year-old grassland	0-5cm	5	Imperata cylindrical (L.) Beauv	2.5	0.18	11.11	148.82	7.38	86.83	30.23	35.8	21.6	42.6	1.07	6.45	53.23	22.55	0.12	491.03
5-year-old grassland	5-10cm	5	Imperata cylindrical (L.) Beauv	2.29	0.16	11.31	148.82	7.11	66	26.2	34	22.2	43.8	1.22	6.19	48.96	22.19	0.17	10.71
5-year-old grassland	10-20cm	5	Imperata cylindrical (L.) Beauv	2.19	0.14	11.08	129.08	5.19	58	23.55	34.4	20.4	45.2	1.23	6.3	52.52	23.9	0.2	26.59
5-year-old grassland	20-30cm	5	Imperata cylindrical (L.) Beauv	1.63	0.13	11.03	92.82	3.12	39	18.56	38.6	18.2	43.2	1.34	6.87	47.79	21.99	0.15	5
5-year-old grassland	30-40cm	5	Imperata cylindrical (L.) Beauv	1.48	0.12	10.73	113.82	2.29	40	18.69	39.4	17.6	43	1.3	6.8	46.5	20.97	0.13	4.21
5-year-old grassland	0-5cm	5	Imperata cylindrical (L.) Beauv	2.26	0.19	10.83	148.82	6.59	96.81	27.39	33.8	20.4	45.8	1.1	5.92	48.79	20.86	0.55	122.46
5-year-old grassland	5-10cm	5	Imperata cylindrical (L.) Beauv	2.13	0.17	10.63	158.62	5.48	64.87	23.01	34	19.8	46.2	1.25	6	46.24	21.27	0.35	151.98
5-year-old grassland	10-20cm	5	Imperata cylindrical (L.) Beauv	1.89	0.12	10.4	108.92	4.94	55	22.07	33.4	20.2	46.4	1.33	6.32	45.62	19.66	0.15	222.62
5-year-old grassland	20-30cm	5	Imperata cylindrical (L.) Beauv	1.44	0.13	9.76	89.32	3.69	43	17.29	36.4	17.2	46.4	1.3	6.79	46.68	19.99	0.59	41.35
5-year-old grassland	30-40cm	5	Imperata cylindrical (L.) Beauv	1.48	0.12	10.62	92.26	2.99	43.91	15.95	34.2	22.4	43.4	1.34	6.58	53.63	25.46	0.51	1.98
15-year-old shrubland	0-5cm	15	Imperata cylindrical (L.) Beauv	2.68	0.11	12.81	277.06	4.36	95.81	37.82	37.6	16.6	45.8	0.98	6.44	57.86	30.88	0.2	75.63
15-year-old shrubland	5-10cm	15	Imperata cylindrical (L.) Beauv	3.04	0.1	14.79	272.02	3.37	77	37.71	49.4	8.6	42	1.06	6.7	58.64	30.36	0.17	68.02
15-year-old shrubland	10-20cm	15	Imperata cylindrical (L.) Beauv	2.4	0.1	14.32	248.5	3.69	66.87	30.59	52.4	7.8	39.8	1.07	7.05	55.64	30.38	0.17	55.16
15-year-old shrubland	20-30cm	15	Imperata cylindrical (L.) Beauv	1.16	0.08	13.79	122.5	2.16	50	14.26	22.4	19.4	58.2	1.45	7.6	45.43	21.88	0.66	49.13
15-year-old shrubland	30-40cm	15	Imperata cylindrical (L.) Beauv	0.87	0.07	15.09	93.8	1.88	58	9.13	35.4	27.8	36.8	1.38	7.72	47.32	24.24	0.38	13.89
15-year-old shrubland	0-5cm	15	Imperata cylindrical (L.) Beauv	2.3	0.16	11.08	336.28	8.38	91.63	49.96	49.2	10.4	40.4	1.07	7.21	53.22	23.04	0.46	409.92
15-year-old shrubland	5-10cm	15	Imperata cylindrical (L.) Beauv	3.39	0.15	10.81	325.36	3.64	74	44.56	47.6	12.6	39.8	1.18	7.2	51.9	24.82	0.23	222.46
15-year-old shrubland	10-20cm	15	Imperata cylindrical (L.) Beauv	0.98	0.13	10.64	267.82	2.83	54	31.34	48.8	9	42.2	1.44	6.79	47.75	22.86	0.33	168.17
15-year-old shrubland	20-30cm	15	Imperata cylindrical (L.) Beauv	1.24	0.1	8.47	185.08	2.4	44	20.06	33	23.6	43.4	1.31	6.21	46.9	23.12	0.3	7.86
15-year-old shrubland	30-40cm	15	Imperata cylindrical (L.) Beauv	1.67	0.06	10.42	93.94	2.14	49	11.01	22.8	37.4	39.8	1.24	5.81	52.67	27.08	0.49	11.35
15-year-old shrubland	0-5cm	15	Imperata cylindrical (L.) Beauv	3.65	0.11	19.76	325.92	3.09	137	48.26	49	10.4	40.6	1.02	7.06	58.48	29.02	0.13	76.43
15-year-old shrubland	5-10cm	15	Imperata cylindrical (L.) Beauv	3.2	0.11	16.31	309.96	3.27	95.81	40.2	50	6.8	43.2	1.04	6.78	60.83	31.41	0.12	65
15-year-old shrubland	10-20cm	15	Imperata cylindrical (L.) Beauv	3.39	0.12	17.38	253.82	2.81	106	45.52	50.2	8.8	41	1.04	6.61	60.44	32.42	0.16	45.79
15-year-old shrubland	20-30cm	15	Imperata cylindrical (L.) Beauv	3.77	0.14	18.45	145.1	1.96	106.79	26.76	53.8	8.2	38	0.83	6.78	62.31	36.72	1.34	179.76
15-year-old shrubland	30-40cm	15	Imperata cylindrical (L.) Beauv	1.89	0.1	16.95	171.64	1.3	83.83	23.61	35.8	26.2	38	1.14	6.69	57.71	28.29	0.35	223.41
20-year-old shrubland	0-5cm	20	Pyracantha fortuneana、Artemisia annua、Rubus et al.、Zanthoxylum simulans	4.04	0.13	12.79	278.04	3.71	162	55.97	33	20	47	1.01	6.36	53.64	31.39	0.13	472.3
20-year-old shrubland	5-10cm	20	Pyracantha fortuneana、Artemisia annua、Rubus et al.、Zanthoxylum simulans	3.68	0.12	12.83	241.72	2.6	79	42.62	41.8	14.2	44	1.09	6.51	62.85	33.39	0.12	202.78
20-year-old shrubland	10-20cm	20	Pyracantha fortuneana、Artemisia annua、Rubus et al.、Zanthoxylum simulans	0.99	0.06	10.48	83.86	2.6	28.94	12.03	33.6	13.8	52.6	1.5	6.89	45.22	19.08	0.13	120.71
20-year-old shrubland	20-30cm	20	Pyracantha fortuneana、Artemisia annua、Rubus et al.、Zanthoxylum simulans	0.58	0.05	9.18	76.82	0.78	28	6.77	27.6	18	54.4	1.48	6.81	39.43	18.05	0.38	46.43
20-year-old shrubland	30-40cm	20	Pyracantha fortuneana、Artemisia annua、Rubus et al.、Zanthoxylum simulans	0.87	0.05	12.12	35.42	0.9	42.91	6.03	25	30	45	1.33	6.75	44.11	20.91	0.27	18.65
20-year-old shrubland	0-5cm	20	Pyracantha fortuneana、Artemisia annua、Rubus et al.、Zanthoxylum simulans	4.99	0.13	12.46	274.68	3.71	171	55.97	31.8	17.8	50.4	1.13	6.09	50.63	34.34	0.17	893.25
20-year-old shrubland	5-10cm	20	Pyracantha fortuneana、Artemisia annua、Rubus et al.、Zanthoxylum simulans	3.97	0.12	12.82	246.82	2.52	78.84	37.12	32.2	18.4	49.4	1.11	6.11	56.43	28.83	0.17	517.7
20-year-old shrubland	10-20cm	20	Pyracantha fortuneana、Artemisia annua、Rubus et al.、Zanthoxylum simulans	2.08	0.1	12.58	87.5	2.25	64	45.92	32.8	17.6	49.6	1.2	6.27	54.22	28.19	0.14	515.16
20-year-old shrubland	20-30cm	20	Pyracantha fortuneana、Artemisia annua、Rubus et al.、Zanthoxylum simulans	2.2	0.09	11.66	73.08	2.03	34.93	10.89	30.2	18.2	51.6	1.52	6.93	43.77	20.56	0.1	427.86
20-year-old shrubland	30-40cm	20	Pyracantha fortuneana、Artemisia annua、Rubus et al.、Zanthoxylum simulans	1.66	0.06	11.63	30.78	1.86	44	11.76	26.6	28	45.4	1.33	6.83	46.97	23.94	0.1	324.37
20-year-old shrubland	0-5cm	20	Pyracantha fortuneana、Artemisia annua、Rubus et al.、Zanthoxylum simulans	3.87	0.15	13.27	286.28	3.72	172.65	68.78	36	22.4	41.6	0.85	6.28	64.85	34.05	1.16	139.13
20-year-old shrubland	5-10cm	20	Pyracantha fortuneana、Artemisia annua、Rubus et al.、Zanthoxylum simulans	4.57	0.11	12.49	247.48	4.12	84	60	38.2	15.8	46	0.93	6.53	60.53	33.93	0.46	107.86
20-year-old shrubland	10-20cm	20	Pyracantha fortuneana、Artemisia annua、Rubus et al.、Zanthoxylum simulans	2.29	0.09	12.62	83.12	1.91	72	30.15	30.8	29.8	39.4	1.09	6.77	53.89	29.16	0.3	104.68
20-year-old shrubland	20-30cm	20	Pyracantha fortuneana、Artemisia annua、Rubus et al.、Zanthoxylum simulans	1.64	0.07	12.24	72.78	1.79	83	14.21	29.4	37.8	32.8	1.06	7	54.02	31.64	0.47	6.75
20-year-old shrubland	30-40cm	20	Pyracantha fortuneana、Artemisia annua、Rubus et al.、Zanthoxylum simulans	1.58	0.08	12.07	31.78	1.63	85.83	12.66	25.2	43.4	31.4	0.99	7.1	64.07	37.19	0.52	17.06
40-year-old woodland	0-5cm	40	CatalpabungeiC.A.Mey, Celtis sinensis Pers	3.02	0.15	19.1	270.48	4.62	191	53.74	32.6	23.8	43.6	1.16	6.2	59.59	21.87	2.91	244.68
40-year-old woodland	5-10cm	40	CatalpabungeiC.A.Mey, Celtis sinensis Pers	2.02	0.13	18.1	200.2	3.52	105	40	29.6	26.6	43.8	1.25	6.25	51.11	22.88	1.64	73.25
40-year-old woodland	10-20cm	40	CatalpabungeiC.A.Mey, Celtis sinensis Pers	1.89	0.12	17.16	182.42	2.28	94	30.02	27.4	29.6	43	1.26	6.18	42.08	19.32	1.5	6.11
40-year-old woodland	20-30cm	40	CatalpabungeiC.A.Mey, Celtis sinensis Pers	1.24	0.11	16.35	121.66	2.4	95	21.47	22.2	40	37.8	1.24	6.21	51.44	25.57	1.23	31.35
40-year-old woodland	30-40cm	40	CatalpabungeiC.A.Mey, Celtis sinensis Pers	1.44	0.11	17.16	111.02	1.58	107	18.54	23.2	42.6	34.2	1.13	6.2	57.63	30.82	1.54	38.97
40-year-old woodland	0-5cm	40	CatalpabungeiC.A.Mey, Celtis sinensis Pers	2.22	0.23	21.23	352.52	9.89	277	84.7	36.2	30.8	33	1.09	6.95	50.36	23.48	0.66	221.35
40-year-old woodland	5-10cm	40	CatalpabungeiC.A.Mey, Celtis sinensis Pers	3.57	0.19	21.41	311.08	3.34	143	76.46	35.8	31	33.2	1.08	6.99	52.58	25.05	0.67	313.89
40-year-old woodland	10-20cm	40	CatalpabungeiC.A.Mey, Celtis sinensis Pers	0.75	0.17	21.2	299.32	3.64	135.73	61.63	35.4	29.4	35.2	1.17	7.09	52.61	25.29	0.84	158.02
40-year-old woodland	20-30cm	40	CatalpabungeiC.A.Mey, Celtis sinensis Pers	1.55	0.12	18.87	204.12	2.74	118.76	36.38	32	31.6	36.4	1.05	7.95	59.05	29.29	1.28	51.19
40-year-old woodland	30-40cm	40	CatalpabungeiC.A.Mey, Celtis sinensis Pers	1.43	0.11	18.86	150.78	1.38	106.79	24.82	27	42	31	1.11	7.89	68.11	31.75	1.36	23.41
40-year-old woodland	0-5cm	40	CatalpabungeiC.A.Mey, Celtis sinensis Pers	3.03	0.19	13.27	246.82	11.57	262.48	63.98	39.6	37.6	22.8	1.44	6.64	44	19.11	0.14	336.59
40-year-old woodland	5-10cm	40	CatalpabungeiC.A.Mey, Celtis sinensis Pers	2.49	0.24	13.06	238.42	11.44	136	51.51	37.8	20.2	42	1.16	6.61	50.1	19.65	0.23	237.38
40-year-old woodland	10-20cm	40	CatalpabungeiC.A.Mey, Celtis sinensis Pers	2.18	0.21	12.62	203.98	6.37	121.76	45.4	36.8	19.6	43.6	1.29	6.75	50.08	19.15	0.23	221.83
40-year-old woodland	20-30cm	40	CatalpabungeiC.A.Mey, Celtis sinensis Pers	1.89	0.16	11.94	158.9	3.1	104	41.14	36	19	45	1.29	6.9	47.07	18.3	0.51	306.27
40-year-old woodland	30-40cm	40	CatalpabungeiC.A.Mey, Celtis sinensis Pers	1.8	0.09	11.38	197.82	2	97.8	33.76	39.4	14.2	46.4	1.24	6.62	48.26	20.21	0.94	135.32

## Sheet: mineralization
vegetation	soil depth	NH4+-N	NO3--N	inorganic nitrogen	7th day of culture	NH4+-N	NO3--N	inorganic nitrogen	14th day of culture	NH4+-N	NO3--N	inorganic nitrogen	21st day of culture	NH4+-N	NO3--N	inorganic nitrogen	28th day of culture	NH4+-N	NO3--N	inorganic nitrogen	35th day of culture	NH4+-N	NO3--N	inorganic nitrogen	NMR was cultured for 7 days.	NMR was cultured for 14 days.	NMR was cultured for 21 days.	NMR was cultured for 28 days.	NMR was cultured for 7 days.	AR was cultured for 7 days.	AR was cultured for 7 days.	AR was cultured for 14 days.	AR was cultured for 14 days.	AR was cultured for 21 days.	AR was cultured for 21 days.	AR was cultured for 28 days.	AR was cultured for 28 days.	AR was cultured for 35 days.	AR was cultured for 35 days.	NR was cultured for 7 days.	NR was cultured for 14 days.	NR was cultured for 21 days.	NR was cultured for 28 days.	NR was cultured for 35 days.
cropland	0-5cm	0.183305	393.571	393.755		0.18356	532.75	532.933		0.12276	488.792	488.914		0.93748	374.251	375.189		0.38794	256.27	256.658		0.27706	175.586	175.863	19.8826	6.79712	-0.884084	-4.89632	-6.22549	3.64286e-05	0.0364286	-0.00432464	-4.32464	0.0359131	35.9131	0.00730839	7.30839	0.00267871	2.67871	19.8826	6.80144	-0.919997	-4.90363	-6.22817
cropland	5-10cm	0.20462	317.698	317.903		0.19268	353.59	353.783		0.09236	483.012	483.105		0.98004	311.463	312.443		0.35122	238.333	238.685		1.17064	146.577	147.747	5.12569	11.8001	-0.26001	-2.82923	-4.86159	-0.00170571	-1.70571	-0.00801857	-8.01857	0.0369248	36.9248	0.00523571	5.23571	0.0276006	27.6006	5.1274	11.8081	-0.296934	-2.83447	-4.8892
cropland	10-20cm	0.17417	30.0794	30.2535		0.23828	90.718	90.9563		0.1106	204.904	205.014		0.96484	39.6065	40.5713		0.32062	19.6032	19.9238		0.6046	48.3784	48.983	8.67183	12.4829	0.491324	-0.368919	0.535127	0.00915857	9.15857	-0.00454071	-4.54071	0.037651	37.651	0.00523036	5.23036	0.012298	12.298	8.66267	12.4875	0.453673	-0.37415	0.522829
cropland	20-30cm	0.19853	6.5873	6.78583		0.19572	72.3292	72.525		0.12884	172.329	172.458		1.00436	35.6715	36.6759		0.45526	16.5873	17.0426		0.36928	10.9009	11.2702	9.39131	11.8337	1.42334	0.366312	0.128124	-0.000401429	-0.401429	-0.00497786	-4.97786	0.0383729	38.3729	0.00916893	9.16893	0.00487857	4.87857	9.39171	11.8387	1.38496	0.357143	0.123246
cropland	30-40cm	0.17417	7.85714	8.03131		0.1866	75.3065	75.4931		0.15316	171.278	171.432		0.99524	24.2087	25.204		0.12784	9.44444	9.57228		0.85582	10.3604	11.2162	9.6374	11.6715	0.817745	0.0550347	0.0909962	0.00177571	1.77571	-0.00150071	-1.50071	0.0390986	39.0986	-0.00165464	-1.65464	0.0194757	19.4757	9.63562	11.673	0.778647	0.0566893	0.0715205
cropland	0-5cm	0.207665	390.238	390.446		0.22612	508.757	508.983		0.1106	415.236	415.347		1.01956	343.114	344.133		0.35122	201.508	201.859		0.97666	140.09	141.067	16.9338	1.77866	-2.20535	-6.73524	-7.12511	0.00263643	2.63643	-0.00693321	-6.93321	0.0386617	38.6617	0.00512696	5.12696	0.0219713	21.9713	16.9312	1.7856	-2.24402	-6.74036	-7.14709
cropland	5-10cm	0.195485	367.857	368.053		0.15924	364.799	364.958		0.09236	550.613	550.705		0.94964	433.618	434.568		0.14008	271.984	272.124		1.3837	195.405	196.789	-0.442113	13.0466	3.1674	-3.42602	-4.89324	-0.00517786	-5.17786	-0.00736607	-7.36607	0.0359121	35.9121	-0.00197875	-1.97875	0.033949	33.949	-0.436935	13.054	3.13149	-3.42404	-4.92719
cropland	10-20cm	0.19853	214.841	215.04		0.2018	253.765	253.967		0.10452	459.019	459.124		1.0378	296.407	297.445		0.40324	318.016	318.419		0.7159	142.973	143.689	5.56105	17.4346	3.92406	3.69212	-2.0386	0.000467143	0.467143	-0.006715	-6.715	0.0399652	39.9652	0.00731107	7.31107	0.014782	14.782	5.56058	17.4413	3.88409	3.68481	-2.05338
cropland	20-30cm	0.22898	242.778	243.007		0.19572	94.2207	94.4164		0.11668	239.93	240.047		1.0682	111.805	112.873		0.15844	19.4444	19.6029		0.67774	80.6306	81.3084	-21.2272	-0.211438	-6.19684	-7.97871	-4.61995	-0.00475143	-4.75143	-0.00802143	-8.02143	0.0399629	39.9629	-0.00251929	-2.51929	0.0128217	12.8217	-21.2224	-0.203416	-6.2368	-7.97619	-4.63278
cropland	30-40cm	0.18635	147.063	147.25		0.22308	95.7968	96.0199		0.14404	116.813	116.957		0.99828	18.3918	19.3901		0.40018	17.5397	17.9399		1.03072	74.8649	75.8956	-7.31856	-2.1638	-6.08856	-4.61821	-2.03869	0.00524714	5.24714	-0.00302214	-3.02214	0.0386633	38.6633	0.00763679	7.63679	0.0241249	24.1249	-7.32381	-2.16078	-6.12722	-4.62585	-2.06282
cropland	0-5cm	0.47258	440.873	441.346		0.42068	515.236	515.657		0.11972	777.233	777.353		0.91012	656.373	657.283		0.35734	505.635	505.992		1.10386	370.541	371.644	10.6159	24.0005	10.2827	2.30881	-1.99146	-0.00741429	-7.41429	-0.0252043	-25.2043	0.0208352	20.8352	-0.00411571	-4.11571	0.0180366	18.0366	10.6233	24.0257	10.2619	2.31293	-2.0095
cropland	5-10cm	0.250295	346.905	347.155		0.4602	458.319	458.779		0.10148	496.848	496.949		0.85236	524.294	525.147		0.3145	258.016	258.33		0.95758	212.883	213.84	15.9463	10.6996	8.47579	-3.17231	-3.80899	0.0299864	29.9864	-0.0106296	-10.6296	0.0286698	28.6698	0.00229304	2.29304	0.0202081	20.2081	15.9163	10.7102	8.44712	-3.1746	-3.8292
cropland	10-20cm	0.225935	256.587	256.813		0.23524	338.179	338.414		0.09844	477.758	477.857		0.92836	225.92	226.848		0.35122	216.429	216.78		1.07206	181.532	182.604	11.6572	15.7888	-1.42692	-1.42977	-2.12028	0.00132929	1.32929	-0.00910679	-9.10679	0.0334488	33.4488	0.00447446	4.47446	0.024175	24.175	11.6559	15.7979	-1.46037	-1.43424	-2.14445
cropland	20-30cm	0.1559	39.127	39.2829			86.1646	86.3938		0.15316	188.967	189.12		0.98004	93.1565	94.1366		0.45526	45.6349	46.0902		1.2088	11.2613	12.4701	6.73013	10.7026	2.61208	0.243118	-0.766081	#VALUE!	#VALUE!	-0.000195714	-0.195714	0.0392448	39.2448	0.0106914	10.6914	0.0300829	30.0829	6.71966	10.7028	2.57284	0.232426	-0.796164
cropland	30-40cm	0.21071	59.7619	59.9726		0.20484	208.932	209.137		0.27172	248.687	248.958		1.1138	127.203	128.317		0.33898	96.4286	96.7676		0.99574	63.3333	64.3291	21.3091	13.499	3.25447	1.3141	0.12447	-0.000838571	-0.838571	0.00435786	4.35786	0.0430043	43.0043	0.00458107	4.58107	0.0224294	22.4294	21.31	13.4946	3.21147	1.30952	0.102041
5-year-old grassland	0-5cm	0.432995	56.4286	56.8616		1.09556	161.121	162.216		0.09236	242.382	242.474		0.66388	125.663	126.327		1.0642	109.444	110.509		2.1151	105.135	107.25	15.0507	13.258	3.30787	1.91597	1.43968	0.0946521	94.6521	-0.0243311	-24.3311	0.0109945	10.9945	0.022543	22.543	0.0480601	48.0601	14.956	13.2824	3.29688	1.89342	1.39162
5-year-old grassland	5-10cm	0.207665	47.381	47.5886		0.64868	73.5552	74.2038		0.10148	211.559	211.66		0.69732	38.2378	38.9351		0.11254	17.8571	17.9697		1.495	65.6757	67.1707	3.80218	11.7194	-0.412071	-1.05782	0.559487	0.0630021	63.0021	-0.00758464	-7.58464	0.0233169	23.3169	-0.00339732	-3.39732	0.036781	36.781	3.73917	11.727	-0.435388	-1.05442	0.522706
5-year-old grassland	10-20cm	0.122405	32.1429	32.2653		0.50276	45.5342	46.0369		0.11972	173.905	174.025		0.4146	26.0907	26.5053		0.10948	13.4127	13.5222		0.7795	57.2072	57.9867	1.96738	10.1257	-0.274285	-0.669396	0.734898	0.0543364	54.3364	-0.000191786	-0.191786	0.013914	13.914	-0.000461607	-0.461607	0.0187741	18.7741	1.91304	10.1259	-0.288199	-0.668934	0.716124
5-year-old grassland	20-30cm	0.122405	35.6349	35.7573		0.52708	33.6252	34.1523		0.11972	130.998	131.118		0.7186	21.3003	22.0189		0.1003	21.9841	22.0844		1.3042	13.964	15.2682	-0.22929	6.81147	-0.654213	-0.488318	-0.585405	0.0578107	57.8107	-0.000191786	-0.191786	0.0283902	28.3902	-0.000789464	-0.789464	0.0337656	33.7656	-0.2871	6.81167	-0.682603	-0.487528	-0.61917
5-year-old grassland	30-40cm	0.14372	10.5556	10.6993		0.54532	26.7951	27.3404		0.16228	132.399	132.562		0.80068	11.8905	12.6912		0.10336	40.5556	40.6589		0.4138	24.5946	25.0084	2.37731	8.70445	0.0948528	1.06999	0.408832	0.0573714	57.3714	0.00132571	1.32571	0.0312838	31.2838	-0.00144143	-1.44143	0.00771657	7.71657	2.31993	8.70312	0.063569	1.07143	0.401115
5-year-old grassland	0-5cm	0.122405	491.032	491.154		0.5666	149.562	150.129		0.28084	1515.94	1516.22		1.36612	14.1146	15.4807		1.02136	67.6984	68.7198		0.26116	110.36	110.622	-48.7179	73.2188	-22.6511	-15.0869	-10.8724	0.0634564	63.4564	0.0113168	11.3168	0.0592245	59.2245	0.0321055	32.1055	0.00396443	3.96443	-48.7814	73.2075	-22.7103	-15.119	-10.8763
5-year-old grassland	5-10cm	0.17417	10.7143	10.8885		0.5362	85.1138	85.65		0.18052	136.778	136.958		1.17156	9.32421	10.4958		0.1003	60.7143	60.8146		0.37564	65.3153	65.691	10.6802	9.00497	-0.0186994	1.78308	1.56579	0.0517186	51.7186	0.000453571	0.453571	0.0474948	47.4948	-0.00263821	-2.63821	0.00575629	5.75629	10.6285	9.00452	-0.0661941	1.78571	1.56003
5-year-old grassland	10-20cm	0.19853	26.5873	26.7858		0.60916	48.6865	49.2957		0.11972	128.722	128.841		1.15636	16.6809	17.8373		0.09724	15.7937	15.8909		0.40108	58.8288	59.2299	3.21569	7.28967	-0.426121	-0.389105	0.926974	0.0586614	58.6614	-0.00562929	-5.62929	0.045611	45.611	-0.0036175	-3.6175	0.00578714	5.78714	3.15703	7.2953	-0.471732	-0.385488	0.921186
5-year-old grassland	20-30cm	0.146765	5	5.14677		0.5514	47.1103	47.6617		0.13188	113.485	113.617		0.7338	12.5749	13.3087		0.40324	7.22222	7.62546		1.2088	28.018	29.2268	6.07357	7.74787	0.388661	0.0885249	0.688002	0.057805	57.805	-0.00106321	-1.06321	0.027954	27.954	0.00915982	9.15982	0.0303439	30.3439	6.01576	7.74894	0.360707	0.0793651	0.657658
5-year-old grassland	30-40cm	0.13154	4.20635	4.33789		0.4906	52.1891	52.6797		0.07412	120.665	120.74		0.74596	6.75791	7.50387		0.33286	3.4127	3.74556		0.43606	8.1982	8.63426	6.90598	8.31441	0.150761	-0.0211547	0.122753	0.0512943	51.2943	-0.00410143	-4.10143	0.0292581	29.2581	0.00719	7.19	0.00870057	8.70057	6.85468	8.31851	0.121503	-0.0283447	0.114053
5-year-old grassland	0-5cm	0.548705	122.46	123.009		0.91924	153.59	154.509		0.10452	270.578	270.682		0.94356	292.301	293.245		0.1156	133.571	133.687		1.04026	109.459	110.5	4.50006	10.5481	8.10646	0.381357	-0.357409	0.0529336	52.9336	-0.0317275	-31.7275	0.0188026	18.8026	-0.015468	-15.468	0.0140444	14.0444	4.44713	10.5798	8.08766	0.396825	-0.371453
5-year-old grassland	5-10cm	0.35078	151.984	152.335		0.70036	68.6515	69.3518		0.1106	133.275	133.386		1.0226	40.8041	41.8267		0.10642	15	15.1064		0.3343	61.1712	61.5055	-11.8547	-1.35353	-5.2623	-4.90102	-2.59513	0.04994	49.94	-0.0171557	-17.1557	0.0319914	31.9914	-0.00872714	-8.72714	-0.000470857	-0.470857	-11.9047	-1.33637	-5.29429	-4.89229	-2.59466
5-year-old grassland	10-20cm	0.152855	222.619	222.772		1.11684	21.7163	22.8331		0.25348	177.933	178.187		1.11988	88.7083	89.8282		0.92038	13.4127	14.3331		1.14838	38.8288	39.9772	-28.5627	-3.18464	-6.33065	-7.44424	-5.22271	0.137712	137.712	0.0071875	7.1875	0.0460488	46.0488	0.0274116	27.4116	0.0284436	28.4436	-28.7004	-3.19183	-6.3767	-7.47166	-5.25115
5-year-old grassland	20-30cm	0.585245	41.3492	41.9345		0.9162	30.4729	31.3891		0.19876	145.009	145.208		1.1594	28.4859	29.6453		0.90508	39.9206	40.8257		0.382	21.8919	22.2739	-1.50649	7.37665	-0.585198	-0.0395977	-0.56173	0.0472793	47.2793	-0.0276061	-27.6061	0.0273407	27.3407	0.0114227	11.4227	-0.005807	-5.807	-1.55376	7.40425	-0.612539	-0.0510204	-0.555923
5-year-old grassland	30-40cm	0.50912	1.98413	2.49325		0.63044	32.3993	33.0297		0.25956	162.172	162.431		0.9162	52.9512	53.8674		1.00912	10.2381	11.2472		0.42334	9.45946	9.8828	4.36236	11.4241	2.44639	0.312642	0.21113	0.0173314	17.3314	-0.0178257	-17.8257	0.0193848	19.3848	0.0178571	17.8571	-0.00245086	-2.45086	4.34502	11.442	2.42701	0.294785	0.213581
15-year-old shrubland	0-5cm	0.201575	75.6349	75.8365		0.51796	463.923	464.441		0.1562	275.832	275.988		1.17764	114.371	115.549		0.64498	100.714	101.359		1.35508	127.477	128.833	55.5149	14.2965	1.89107	0.911528	1.51417	0.0451979	45.1979	-0.00324107	-3.24107	0.0464793	46.4793	0.0158359	15.8359	0.0329573	32.9573	55.4697	14.2998	1.84459	0.895692	1.48122
15-year-old shrubland	5-10cm	0.16808	68.0159	68.184		0.5058	505.254	505.76		0.1866	393.87	394.057		1.01652	240.291	241.307		0.76126	157.222	157.983		1.11022	111.622	112.732	62.5108	23.2766	8.24397	3.20713	1.2728	0.0482457	48.2457	0.00132286	1.32286	0.0404019	40.4019	0.021185	21.185	0.0269183	26.9183	62.4626	23.2753	8.20357	3.18594	1.24588
15-year-old shrubland	10-20cm	0.17417	55.1587	55.3329		0.45108	263.923	264.374		0.19268	325.569	325.762		1.02564	82.207	83.2327		0.70924	139.127	139.836		0.24844	108.198	108.447	29.863	19.3164	1.32856	3.01798	1.51754	0.0395586	39.5586	0.00132214	1.32214	0.0405462	40.5462	0.0191096	19.1096	0.002122	2.122	29.8235	19.315	1.28801	2.99887	1.51541
15-year-old shrubland	20-30cm	0.66137	49.127	49.7884		0.55748	186.34	186.897		0.2626	152.364	152.627		1.30532	30.71	32.0153		0.79492	11.6667	12.4616		0.17848	34.1441	34.3226	19.587	7.34561	-0.846335	-1.3331	-0.441878	-0.0148414	-14.8414	-0.0284836	-28.4836	0.0306643	30.6643	0.00476964	4.76964	-0.0137969	-13.7969	19.6018	7.37409	-0.876999	-1.33787	-0.428081
15-year-old shrubland	30-40cm	0.38123	13.8889	14.2701		0.6274	80.9107	81.5381		0.23524	143.257	143.493		1.51812	10.6929	12.211		0.87448	10.0794	10.9538		1.00846	12.7027	13.7112	9.60971	9.23018	-0.0980523	-0.118438	-0.0159702	0.0351671	35.1671	-0.0104279	-10.4279	0.0541376	54.1376	0.0176161	17.6161	0.0179209	17.9209	9.57454	9.24061	-0.15219	-0.136054	-0.033891
15-year-old shrubland	0-5cm	0.457355	409.921	410.378		0.63348	412.96	413.593		0.26868	582.487	582.756		1.10772	374.251	375.359		0.6817	312.143	312.825		0.5092	154.865	155.374	0.459316	12.3127	-1.66756	-3.48405	-7.28583	0.0251607	25.1607	-0.0134768	-13.4768	0.0309698	30.9698	0.00801232	8.01232	0.00148129	1.48129	0.434155	12.3262	-1.69853	-3.49206	-7.28731
15-year-old shrubland	5-10cm	0.22898	222.46	222.689		0.60308	452.364	452.967		0.13796	248.161	248.299		1.129	87.5107	88.6397		0.63274	100.238	100.871		0.37246	75.2252	75.5977	32.8969	1.82927	-6.38331	-4.35066	-4.20262	0.0534429	53.4429	-0.00650143	-6.50143	0.0428581	42.8581	0.01442	14.42	0.00409943	4.09943	32.8434	1.83577	-6.42617	-4.36508	-4.20672
15-year-old shrubland	10-20cm	0.329465	168.175	168.504		0.84932	220.49	221.34		0.19876	277.758	277.957		1.47252	234.132	235.604		0.84694	175	175.847		0.5569	159.55	160.106	7.54795	7.81807	3.19525	0.262245	-0.239932	0.074265	74.265	-0.00933607	-9.33607	0.0544312	54.4312	0.0184813	18.4812	0.00649814	6.49814	7.47368	7.82741	3.14082	0.243764	-0.24643
15-year-old shrubland	20-30cm	0.30206	7.85714	8.1592		0.76116	95.7968	96.558		0.1866	159.895	160.082		1.35396	22.1557	23.5096		0.25636	34.3651	34.6214		0.34702	51.982	52.329	12.6284	10.8516	0.730974	0.94508	1.26199	0.0655857	65.5857	-0.00824714	-8.24714	0.0500905	50.0905	-0.00163214	-1.63214	0.00128457	1.28457	12.5628	10.8598	0.680883	0.946712	1.26071
15-year-old shrubland	30-40cm	0.493895	11.3492	11.8431		0.87972	77.4081	78.2878		0.22612	172.855	173.081		1.661	14.9701	16.6311		0.41854	45	45.4185		1.4155	22.2523	23.6678	9.4921	11.517	0.227998	1.19912	0.337847	0.0551179	55.1179	-0.0191268	-19.1268	0.0555764	55.5764	-0.00269125	-2.69125	0.0263316	26.3316	9.43698	11.5361	0.172422	1.20181	0.311516
15-year-old shrubland	0-5cm	0.13154	76.4286	76.5601		0.50884	486.865	487.374		0.13188	329.772	329.904		1.27188	207.271	208.543		0.11866	183.095	183.214		0.34702	168.739	169.086	58.6877	18.096	6.2849	3.80906	2.64359	0.0539	53.9	2.42857e-05	0.0242857	0.0543019	54.3019	-0.00046	-0.46	0.00615657	6.15657	58.6338	18.096	6.2306	3.80952	2.63743
15-year-old shrubland	5-10cm	0.11936	65	65.1194		0.38724	410.333	410.72		0.14404	310.858	311.002		1.15636	282.207	283.363		0.99076	184.524	185.515		0.35974	178.468	178.828	49.3715	17.5631	10.3926	4.29983	3.24882	0.0382686	38.2686	0.00176286	1.76286	0.049381	49.381	0.0311214	31.1214	0.006868	6.868	49.3332	17.5613	10.3432	4.26871	3.24196
15-year-old shrubland	10-20cm	0.158945	45.7937	45.9526		0.48452	280.56	281.045		0.13188	160.595	160.727		1.03172	127.887	128.919		0.11866	42.7778	42.8964		0.11806	75.5856	75.7036	33.5846	8.1982	3.95077	-0.109149	0.85003	0.0465107	46.5107	-0.00193321	-1.93321	0.0415607	41.5607	-0.00143875	-1.43875	-0.00116814	-1.16814	33.5381	8.20013	3.90921	-0.10771	0.851198
15-year-old shrubland	20-30cm	1.34041	179.762	181.102		1.91028	223.292	225.203		0.25044	308.757	309.007		3.89844	140.034	143.933		2.04952	175.476	177.526		1.08796	193.604	194.692	6.30006	9.13605	-1.76998	-0.127736	0.388264	0.0814107	81.4107	-0.0778546	-77.8546	0.121811	121.811	0.0253255	25.3255	-0.00721271	-7.21271	6.21865	9.2139	-1.89179	-0.153061	0.395477
15-year-old shrubland	30-40cm	0.347735	223.413	223.76		0.70036	152.89	153.59		0.52404	327.145	327.669		1.6914	9.66638	11.3578		1.21414	662.619	663.833		0.50602	183.874	184.38	-10.0243	7.42207	-10.1144	15.7169	-1.12516	0.050375	50.375	0.0125932	12.5932	0.063984	63.984	0.030943	30.943	0.00452243	4.52243	-10.0747	7.40948	-10.1784	15.6859	-1.12968
20-year-old shrubland	0-5cm	0.128495	472.302	472.43		0.7338	653.415	654.149		0.20484	625.219	625.424		1.56372	588.794	590.358		1.26922	448.651	449.92		1.21198	349.459	350.671	25.9598	10.9281	5.61559	-0.803931	-3.47882	0.0864721	86.4721	0.00545321	5.45321	0.068344	68.344	0.0407402	40.7402	0.0309567	30.9567	25.8734	10.9227	5.54725	-0.844671	-3.50978
20-year-old shrubland	5-10cm	0.122405	202.778	202.9		0.63044	241.156	241.786		0.52404	725.219	725.743		4.14468	579.897	584.042		1.27534	465.476	466.752		0.91306	438.829	439.742	5.55516	37.3459	18.1496	9.42326	6.76691	0.0725764	72.5764	0.0286882	28.6882	0.191537	191.537	0.0411762	41.1763	0.0225901	22.5901	5.48258	37.3172	17.9581	9.38209	6.74432
20-year-old shrubland	10-20cm	0.13154	120.714	120.846		0.54532	129.072	129.617		0.23524	289.667	289.902		2.12612	181.95	184.077		1.2631	118.333	119.596		1.06888	82.7928	83.8617	1.25304	12.0755	3.01098	-0.0446212	-1.05669	0.0591114	59.1114	0.00740714	7.40714	0.09498	94.98	0.0404129	40.4129	0.0267811	26.7811	1.19393	12.0681	2.916	-0.085034	-1.08347
20-year-old shrubland	20-30cm	0.37514	46.4286	46.8037		0.69732	57.268	57.9653		0.24132	227.846	228.087		2.25988	116.766	119.026		1.13764	43.5714	44.7091		1.33282	9.81982	11.1526	1.59451	12.9488	3.43917	-0.0748087	-1.0186	0.0460257	46.0257	-0.00955857	-9.55857	0.0897495	89.7495	0.0272321	27.2321	0.0273623	27.3623	1.54848	12.9584	3.34942	-0.102041	-1.04596
20-year-old shrubland	30-40cm	0.26552	18.6508	18.9163		0.5058	32.5744	33.0802		0.22004	215.061	215.281		1.61844	58.426	60.0444		1.50484	43.7302	45.235		1.57132	17.5676	19.1389	2.02342	14.0261	1.95848	0.939953	0.00635925	0.0343257	34.3257	-0.00324857	-3.24857	0.0644248	64.4248	0.0442614	44.2614	0.0373086	37.3086	1.98909	14.0293	1.89406	0.895692	-0.0309493
20-year-old shrubland	0-5cm	0.165035	893.254	893.419		0.75508	992.119	992.874		0.16532	1096.85	1097.01		1.21412	1315.91	1317.13		1.09786	857.063	858.161		0.24208	684.775	685.017	14.2079	14.5424	20.1765	-1.2592	-5.95435	0.0842921	84.2921	2.03571e-05	0.0203571	0.0499564	49.9564	0.0333152	33.3152	0.00220129	2.20129	14.1236	14.5424	20.1265	-1.29252	-5.95655
20-year-old shrubland	5-10cm	0.16808	517.698	517.866		0.66388	520.665	521.329		0.48756	740.981	741.468		3.73428	767.408	771.142		0.25942	576.587	576.847		0.29296	515.946	516.239	0.494698	15.9716	12.0608	2.10644	-0.0465025	0.0708286	70.8286	0.02282	22.82	0.169819	169.819	0.00326214	3.26214	0.003568	3.568	0.423869	15.9487	11.8909	2.10317	-0.0500705
20-year-old shrubland	10-20cm	0.14372	515.159	515.302		0.51796	524.343	524.861		0.47844	1071.98	1072.46		3.55492	855.004	858.559		0.29002	622.143	622.433		1.54906	646.216	647.765	1.36554	39.7968	16.3456	3.82609	3.78465	0.0534629	53.4629	0.0239086	23.9086	0.162438	162.438	0.005225	5.225	0.0401526	40.1526	1.31208	39.7729	16.1831	3.82086	3.7445
20-year-old shrubland	20-30cm	0.10109	427.857	427.958		0.75204	517.163	517.915		0.52708	770.053	770.58		4.23588	610.351	614.587		0.31144	427.54	427.851		0.18802	353.063	353.251	12.851	24.473	8.88707	-0.00382537	-2.13449	0.0929929	92.9929	0.0304279	30.4279	0.196895	196.895	0.0075125	7.5125	0.00248371	2.48371	12.758	24.4425	8.69017	-0.0113379	-2.13697
20-year-old shrubland	30-40cm	0.095	324.365	324.46		0.66388	431.524	432.188		0.48756	912.084	912.572		3.88324	815.654	819.538		0.2839	559.127	559.411		0.31204	510	510.312	15.3896	42.008	23.5751	8.3911	5.31006	0.0812686	81.2686	0.02804	28.04	0.180392	180.392	0.00674643	6.74643	0.00620114	6.20114	15.3084	41.9799	23.3947	8.38435	5.30385
20-year-old shrubland	0-5cm	1.16379	139.127	140.291		1.92852	160.771	162.699		0.50276	246.76	247.263		4.853	136.441	141.294		2.24842	76.4286	78.677		0.0004	106.216	106.217	3.20119	7.64086	0.0477916	-2.20049	-0.973548	0.109246	109.246	-0.0472168	-47.2168	0.175676	175.676	0.0387366	38.7366	-0.0332399	-33.2399	3.09194	7.68808	-0.127885	-2.23923	-0.940308
20-year-old shrubland	5-10cm	0.457355	107.857	108.314		0.96788	108.932	109.9		0.39028	277.933	278.324		4.56116	219.76	224.322		1.9822	182.619	184.601		2.28682	153.423	155.71	0.22644	12.1435	5.52415	2.72453	1.35416	0.0729321	72.9321	-0.00479107	-4.79107	0.195419	195.419	0.0544588	54.4588	0.0522704	52.2704	0.153508	12.1483	5.32873	2.67007	1.30189
20-year-old shrubland	10-20cm	0.29597	104.683	104.979		1.4938	93.8704	95.3642		0.32644	307.531	307.857		3.76772	176.133	179.901		1.34266	97.0635	98.4062		1.76848	108.739	110.507	-1.37347	14.4913	3.56775	-0.234727	0.157963	0.171119	171.119	0.00217643	2.17643	0.165321	165.321	0.0373818	37.3818	0.0420717	42.0717	-1.54459	14.4892	3.40242	-0.272109	0.115891
20-year-old shrubland	20-30cm	0.46649	6.74603	7.21252		1.65492	10.8581	12.5131		0.17444	160.245	160.42		3.38468	3.33618	6.72086		1.46506	12.7778	14.2428		1.4632	18.4685	19.9317	0.75722	10.9434	-0.0234122	0.251083	0.363404	0.169776	169.776	-0.0208607	-20.8607	0.138961	138.961	0.0356632	35.6632	0.0284774	28.4774	0.587445	10.9642	-0.162374	0.21542	0.334927
20-year-old shrubland	30-40cm	0.5213	17.0635	17.5848		1.57892	43.958	45.5369		0.53316	140.63	141.164		5.19956	1.62532	6.82488		1.70374	58.9683	60.672		1.7812	37.027	38.8082	3.99316	8.82706	-0.512377	1.53883	0.606384	0.151089	151.089	0.000847143	0.847143	0.222774	222.774	0.04223	42.23	0.0359971	35.9971	3.84207	8.82621	-0.735151	1.4966	0.570387
40-year-old woodland	0-5cm	2.91467	244.683	247.597		2.55476	638.529	641.084		0.32036	399.65	399.97		7.15428	366.382	373.536		2.65234	985.159	987.811		2.37586	161.712	164.088	56.2123	10.8838	5.99708	26.4362	-2.38599	-0.0514157	-51.4157	-0.185308	-185.308	0.201886	201.886	-0.00936893	-9.36893	-0.0153946	-15.3946	56.2638	11.0691	5.79519	26.4456	-2.3706
40-year-old woodland	5-10cm	1.64491	73.254	74.8989		1.67316	290.543	292.216		0.20788	195.797	196.005		3.72212	82.5492	86.2713		1.55686	540.079	541.636		1.37416	29.6396	31.0138	31.0453	8.65042	0.541544	16.6692	-1.25386	0.00403643	4.03643	-0.102645	-102.645	0.098915	98.915	-0.00314446	-3.14446	-0.00773557	-7.73557	31.0413	8.75306	0.442629	16.6723	-1.24612
40-year-old woodland	10-20cm	1.4957	6.11111	7.60681		1.4786	265.674	267.153		0.15012	133.975	134.126		4.00788	4.19162	8.1995		1.40386	400.556	401.959		1.73986	5.31532	7.05518	37.078	9.03706	0.0282231	14.084	-0.015761	-0.00244286	-2.44286	-0.0961129	-96.1129	0.119628	119.628	-0.00328	-3.28	0.006976	6.976	37.0804	9.13317	-0.0914045	14.0873	-0.022737
40-year-old woodland	20-30cm	1.23079	31.3492	32.58		1.22628	169.877	171.104		0.1714	138.354	138.525		3.36644	4.19162	7.55806		1.36102	305.476	306.837		1.19926	27.6577	28.8569	19.7891	7.56751	-1.19152	9.7949	-0.106374	-0.000643571	-0.643571	-0.0756704	-75.6704	0.101698	101.698	0.00465125	4.65125	-0.000900714	-0.900714	19.7897	7.64318	-1.29322	9.79025	-0.105473
40-year-old woodland	30-40cm	1.54442	38.9683	40.5127		1.205	81.0858	82.2908		0.16836	144.483	144.652		1.81908	5.56031	7.37939		1.2937	200.397	201.691		1.11658	4.23423	5.35081	5.96831	7.4385	-1.57778	5.75635	-1.00462	-0.0484886	-48.4886	-0.09829	-98.29	0.013079	13.079	-0.00895429	-8.95429	-0.012224	-12.224	6.01679	7.53679	-1.59085	5.76531	-0.992401
40-year-old woodland	0-5cm	0.664415	221.349	222.014		0.78548	588.441	589.227		0.37508	980.736	981.111		4.55204	914.2	918.752		0.64192	828.175	828.817		0.52828	219.91	220.438	52.459	54.2212	33.178	21.6715	-0.0450123	0.017295	17.295	-0.0206668	-20.6668	0.185125	185.125	-0.000803393	-0.803393	-0.00388957	-3.88957	52.4417	54.2419	32.9929	21.6723	-0.0411228
40-year-old woodland	5-10cm	0.67355	313.889	314.562		0.445	301.226	301.671		0.13188	754.291	754.423		1.27492	541.916	543.191		0.56236	452.778	453.34		0.32476	194.144	194.469	-1.84165	31.4186	10.8871	4.95635	-3.43124	-0.03265	-32.65	-0.0386907	-38.6907	0.0286367	28.6367	-0.00397107	-3.97107	-0.00996543	-9.96543	-1.809	31.4573	10.8584	4.96032	-3.42128
40-year-old woodland	10-20cm	0.83798	158.016	158.854		0.8098	209.282	210.092		0.31732	509.632	509.95		2.8466	424.038	426.884		0.37876	342.143	342.522		0.3979	185.315	185.713	7.3197	25.0783	12.7634	6.55956	0.76741	-0.00402571	-4.02571	-0.03719	-37.19	0.0956486	95.6486	-0.0164007	-16.4007	-0.0125737	-12.5737	7.32373	25.1155	12.6677	6.57596	0.779984
40-year-old woodland	20-30cm	1.28255	51.1905	52.473		1.32356	98.4238	99.7474		0.32036	337.653	337.974		3.78596	186.741	190.527		1.09174	158.651	159.743		0.83992	132.523	133.362	6.75348	20.3929	6.57399	3.83105	2.31113	0.00585857	5.85857	-0.0687279	-68.7279	0.11921	119.21	-0.00681464	-6.81464	-0.0126466	-12.6466	6.74762	20.4616	6.45478	3.83787	2.32377
40-year-old woodland	30-40cm	1.35868	23.4127	24.7714		1.36004	134.151	135.511		0.56356	213.66	214.224		4.50036	65.4405	69.9409		1.2325	149.444	150.677		1.38688	30.1802	31.5671	15.8199	13.5323	2.15093	4.49663	0.194162	0.000195	0.195	-0.0567939	-56.7939	0.149604	149.604	-0.00450625	-4.50625	0.000805857	0.805857	15.8197	13.5891	2.00133	4.50113	0.193357
40-year-old woodland	0-5cm	0.14372	336.587	336.731		0.37204	559.72	560.092		0.19268	1057.09	1057.29		0.88276	1172.37	1173.25		0.58378	790.873	791.457		0.63958	149.459	150.099	31.9087	51.4682	39.8343	16.2402	-5.33234	0.0326171	32.6171	0.00349714	3.49714	0.0351924	35.1924	0.0157164	15.7164	0.0141674	14.1674	31.8761	51.4647	39.7992	16.2245	-5.34651
40-year-old woodland	5-10cm	0.225935	237.381	237.607		0.36596	318.564	318.93		0.141	475.131	475.272		0.99828	393.413	394.411		0.71842	292.778	293.496		0.49966	208.559	209.058	11.6176	16.9761	7.46688	1.99605	-0.815676	0.0200036	20.0036	-0.00606679	-6.06679	0.0367783	36.7783	0.0175888	17.5888	0.00782071	7.82071	11.5976	16.9822	7.43011	1.97846	-0.823497
40-year-old woodland	10-20cm	0.232025	221.825	222.057		0.3842	279.159	279.544		0.34164	301.051	301.392		1.81604	252.951	254.767		0.65722	162.778	163.435		0.42334	150.18	150.604	8.21231	5.66679	1.55761	-2.09366	-2.04154	0.0217393	21.7393	0.00782964	7.82964	0.0754293	75.4293	0.0151855	15.1855	0.00546614	5.46614	8.19057	5.65896	1.48218	-2.10884	-2.04701
40-year-old woodland	20-30cm	0.512165	306.27	306.782		0.61828	290.893	291.511		0.28388	554.816	555.1		2.0714	296.236	298.307		0.76738	199.444	200.212		0.6841	213.604	214.288	-2.18151	17.737	-0.403548	-3.80608	-2.64269	0.0151593	15.1593	-0.0163061	-16.3061	0.0742493	74.2493	0.00911482	9.11482	0.00491243	4.91243	-2.19667	17.7533	-0.477797	-3.81519	-2.64761
40-year-old woodland	30-40cm	0.93542	135.317	136.253		0.99524	150.263	151.258		0.19572	273.905	274.101		2.82228	108.896	111.719		1.26922	100.079	101.349		1.0657	127.117	128.183	2.14358	9.8463	-1.16829	-1.24658	-0.230573	0.00854571	8.54571	-0.0528357	-52.8357	0.0898505	89.8505	0.0119214	11.9214	0.00372229	3.72229	2.13503	9.89914	-1.25814	-1.2585	-0.234296

## Sheet: water content
vegetation	soil depth	Moisture content ( % )	Moisture content	60g soil adjusted to 30 % of the need to add water	60g dry soil adjusted to fresh soil	Bottle weight ( g )	overall amount
cropland	0-5cm	20.3983	0.203983	8.22999	75.3753	20.75	104.355
cropland	5-10cm	22.2534	0.222534	6.63996	77.1738	20.42	104.234
cropland	10-20cm	20.032	0.20032	8.54399	75.03	20.35	103.924
cropland	20-30cm	20	0.2	8.57143	75	20.65	104.221
cropland	30-40cm	19.96	0.1996	8.60571	74.9625	20.68	104.248
cropland	0-5cm	22.3358	0.223358	6.56929	77.2557	20.57	104.395
cropland	5-10cm	19.3958	0.193958	9.0893	74.4378	20.21	103.737
cropland	10-20cm	24.8515	0.248515	4.41302	79.8419	20.58	104.835
cropland	20-30cm	21.0531	0.210531	7.66881	76.0004	20.17	103.839
cropland	30-40cm	25.922	0.25922	3.49539	80.9958	20.44	104.931
cropland	0-5cm	17.1924	0.171924	10.978	72.4571	20.63	104.065
cropland	5-10cm	21.0313	0.210313	7.6875	75.9794	20.27	103.937
cropland	10-20cm	19.2065	0.192065	9.25154	74.2634	20.3	103.815
cropland	20-30cm	21.0531	0.210531	7.66881	76.0004	20.6	104.269
cropland	30-40cm	23.3741	0.233741	5.67937	78.3025	20.36	104.342
5-year-old grassland	0-5cm	20.2627	0.202627	8.34622	75.2471	20.25	103.843
5-year-old grassland	5-10cm	22.5976	0.225976	6.34489	77.517	20.29	104.152
5-year-old grassland	10-20cm	21.7163	0.217163	7.10036	76.6443	20.15	103.895
5-year-old grassland	20-30cm	20.9325	0.209325	7.77216	75.8845	20.43	104.087
5-year-old grassland	30-40cm	27.1575	0.271575	2.43646	82.3695	20.34	105.146
5-year-old grassland	0-5cm	22.5546	0.225546	6.38176	77.474	20.56	104.416
5-year-old grassland	5-10cm	22.1888	0.221888	6.69532	77.1097	20.27	104.075
5-year-old grassland	10-20cm	23.8999	0.238999	5.22862	78.8436	20.66	104.732
5-year-old grassland	20-30cm	21.988	0.21988	6.86743	76.9112	20.3	104.079
5-year-old grassland	30-40cm	20.9731	0.209731	7.73737	75.9235	20.41	104.071
5-year-old grassland	0-5cm	20.8602	0.208602	7.83413	75.8152	20.58	104.229
5-year-old grassland	5-10cm	21.2675	0.212675	7.485	76.2074	20.63	104.322
5-year-old grassland	10-20cm	19.6635	0.196635	8.85985	74.6859	20.61	104.156
5-year-old grassland	20-30cm	19.992	0.19992	8.57827	74.9925	20.34	103.911
5-year-old grassland	30-40cm	25.4618	0.254618	3.88985	80.4957	20.43	104.816
15-year-old shrubland	0-5cm	30.8838	0.308838	-0.75751	86.8103	20.54	106.593
15-year-old shrubland	5-10cm	30.3564	0.303564	-0.305459	86.1529	20.58	106.427
15-year-old shrubland	10-20cm	30.3801	0.303801	-0.325826	86.1823	20.58	106.436
15-year-old shrubland	20-30cm	21.8787	0.218787	6.96114	76.8036	20.59	104.355
15-year-old shrubland	30-40cm	24.2387	0.242387	4.93828	79.1961	20.52	104.654
15-year-old shrubland	0-5cm	25.52	0.2552	3.84	80.5585	20.51	104.909
15-year-old shrubland	5-10cm	24.8211	0.248211	4.43906	79.8096	20.15	104.399
15-year-old shrubland	10-20cm	24.65	0.2465	4.58571	79.6284	20.44	104.654
15-year-old shrubland	20-30cm	23.1248	0.231248	5.89303	78.0486	20.18	104.122
15-year-old shrubland	30-40cm	27.0828	0.270828	2.50045	82.2851	20.49	105.276
15-year-old shrubland	0-5cm	29.019	0.29019	0.840899	84.5296	20.21	105.581
15-year-old shrubland	5-10cm	31.4089	0.314089	-1.20766	87.475	20.54	106.807
15-year-old shrubland	10-20cm	32.4231	0.324231	-2.07697	88.7878	20.4	107.111
15-year-old shrubland	20-30cm	30.02	0.3002	-0.0171429	85.7388	20.14	105.862
15-year-old shrubland	30-40cm	28.2942	0.282942	1.46208	83.6753	20.16	105.297
20-year-old shrubland	0-5cm	31.3855	0.313855	-1.18756	87.4451	20.68	106.937
20-year-old shrubland	5-10cm	33.3851	0.333851	-2.90154	90.07	20.51	107.678
20-year-old shrubland	10-20cm	24.65	0.2465	4.58571	79.6284	20.24	104.454
20-year-old shrubland	20-30cm	18.0527	0.180527	10.2405	73.2178	20.64	104.098
20-year-old shrubland	30-40cm	20.9107	0.209107	7.79083	75.8636	20.39	104.044
20-year-old shrubland	0-5cm	34.3433	0.343433	-3.72283	91.3844	20.2	107.862
20-year-old shrubland	5-10cm	28.8339	0.288339	0.999485	84.3098	20.38	105.689
20-year-old shrubland	10-20cm	28.1867	0.281867	1.55422	83.55	20.54	105.644
20-year-old shrubland	20-30cm	20.5584	0.205584	8.09281	75.5272	20.5	104.12
20-year-old shrubland	30-40cm	23.9399	0.239399	5.19439	78.885	20.58	104.659
20-year-old shrubland	0-5cm	34.0532	0.340532	-3.47416	90.9824	20.4	107.908
20-year-old shrubland	5-10cm	33.9348	0.339348	-3.37267	90.8193	20.61	108.057
20-year-old shrubland	10-20cm	29.1638	0.291638	0.716741	84.7025	20.49	105.909
20-year-old shrubland	20-30cm	29.86	0.2986	0.12	85.5432	20.34	106.003
20-year-old shrubland	30-40cm	28.65	0.2865	1.15714	84.0925	20.47	105.72
40-year-old woodland	0-5cm	29.92	0.2992	0.0685714	85.6164	20.21	105.895
40-year-old woodland	5-10cm	30.14	0.3014	-0.12	85.8861	20.3	106.066
40-year-old woodland	10-20cm	29.84	0.2984	0.137143	85.5188	20.44	106.096
40-year-old woodland	20-30cm	29.6197	0.296197	0.325956	85.2511	20.5	106.077
40-year-old woodland	30-40cm	28.32	0.2832	1.44	83.7054	20.44	105.585
40-year-old woodland	0-5cm	34.2203	0.342203	-3.6174	91.2135	20.27	107.866
40-year-old woodland	5-10cm	26.3435	0.263435	3.13418	81.4592	20.41	105.003
40-year-old woodland	10-20cm	28.64	0.2864	1.16571	84.0807	20.54	105.786
40-year-old woodland	20-30cm	28.5452	0.285452	1.24701	83.9691	20.57	105.786
40-year-old woodland	30-40cm	30.1568	0.301568	-0.134439	85.9068	20.17	105.942
40-year-old woodland	0-5cm	28.31	0.2831	1.44857	83.6937	20.56	105.702
40-year-old woodland	5-10cm	27.1604	0.271604	2.43391	82.3728	20.42	105.227
40-year-old woodland	10-20cm	29.6403	0.296403	0.308277	85.2761	20.54	106.124
40-year-old woodland	20-30cm	31.6632	0.316632	-1.42563	87.8005	20.56	106.935
40-year-old woodland	30-40cm	32.8087	0.328087	-2.40746	89.2973	20.3	107.19
